# Supplementary material for: Ribosomal Protein S12 Hastens Nucleation of Co-Transcriptional Ribosome Assembly
Source: MDPI journal article supplement (doi:10.3390/biom13060951), 2023-06-06
Supplement: s1 [file s1]

**Supplemental Table S1.** MLE analysis of S4-Cy5 binding in the presence and absence of S12 during and after transcription.

| Experiment         | N <sub>mol</sub> | $\tau_1$ (s)    | $\tau_2$ (s)    | $\tau_3$ (s)       | $a_1$             | $a_2$             | $a_3$             |
|--------------------|------------------|-----------------|-----------------|--------------------|-------------------|-------------------|-------------------|
| S4 alone post-txn  | 153              | $0.67 \pm 0.01$ | $5.59 \pm 1.99$ | $101.86 \pm 20.91$ | $0.925 \pm 0.007$ | $0.075 \pm 0.007$ | $0.000 \pm 0.07$  |
| S12 added co-txn   | 143              | $0.94 \pm 0.03$ | $5.65 \pm 0.66$ | $42.74 \pm 7.54$   | $0.781 \pm 0.017$ | $0.182 \pm 0.016$ | $0.036 \pm 0.017$ |
| S12 added post-txn | 151              | $1.06 \pm 0.02$ | $7.70 \pm 0.71$ | $77.33 \pm 17.25$  | $0.881 \pm 0.011$ | $0.114 \pm 0.010$ | $0.004 \pm 0.011$ |
