# Supplementary figures and images for: Ribosomal Protein S12 Hastens Nucleation of Co-Transcriptional Ribosome Assembly
Source: MDPI journal article supplement (doi:10.3390/biom13060951), 2023-06-06

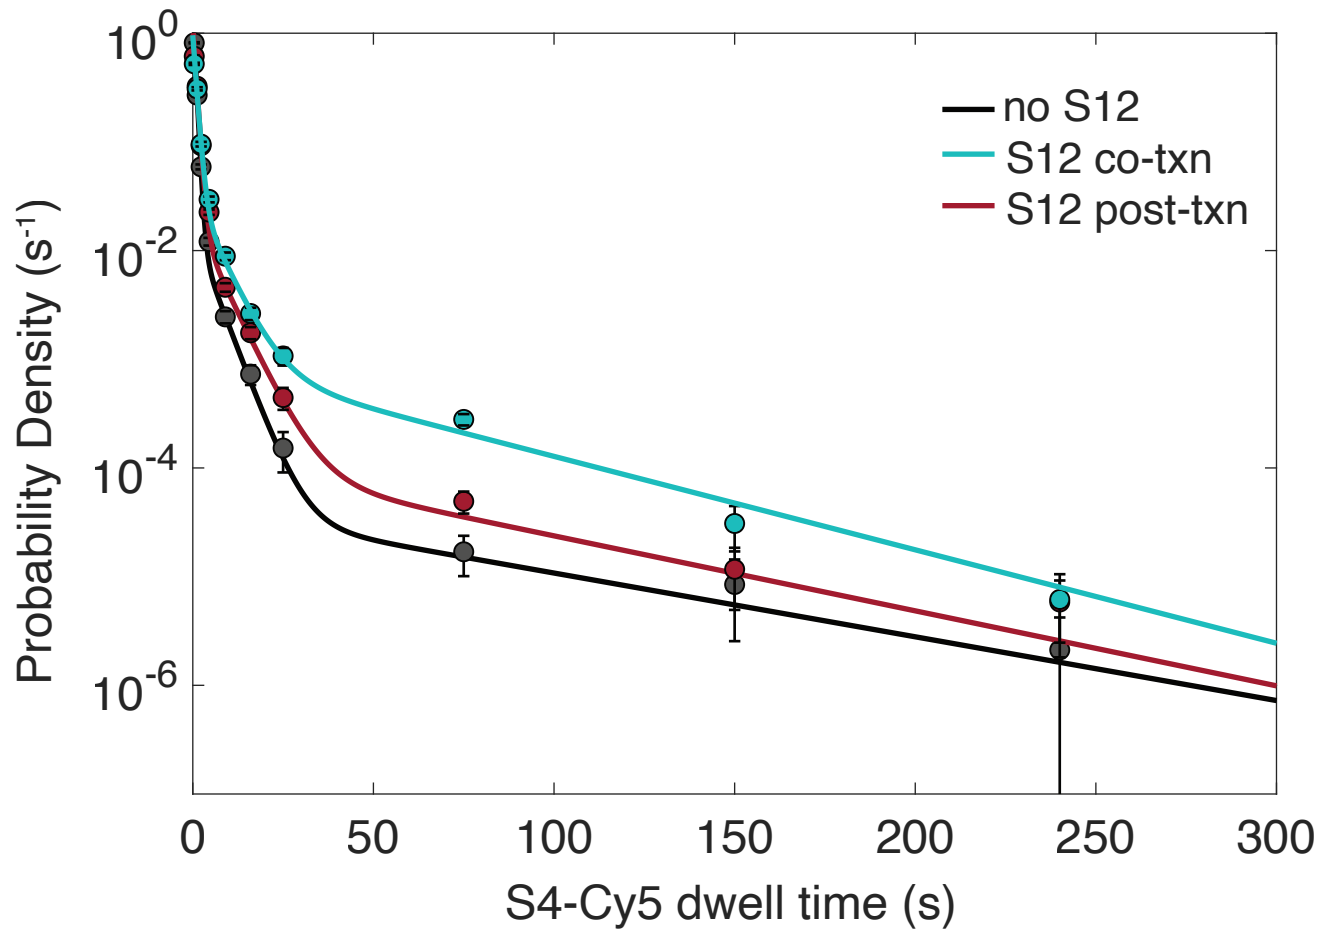

Supplement: s1 [file s1]

a

**S4-Cy5 alone**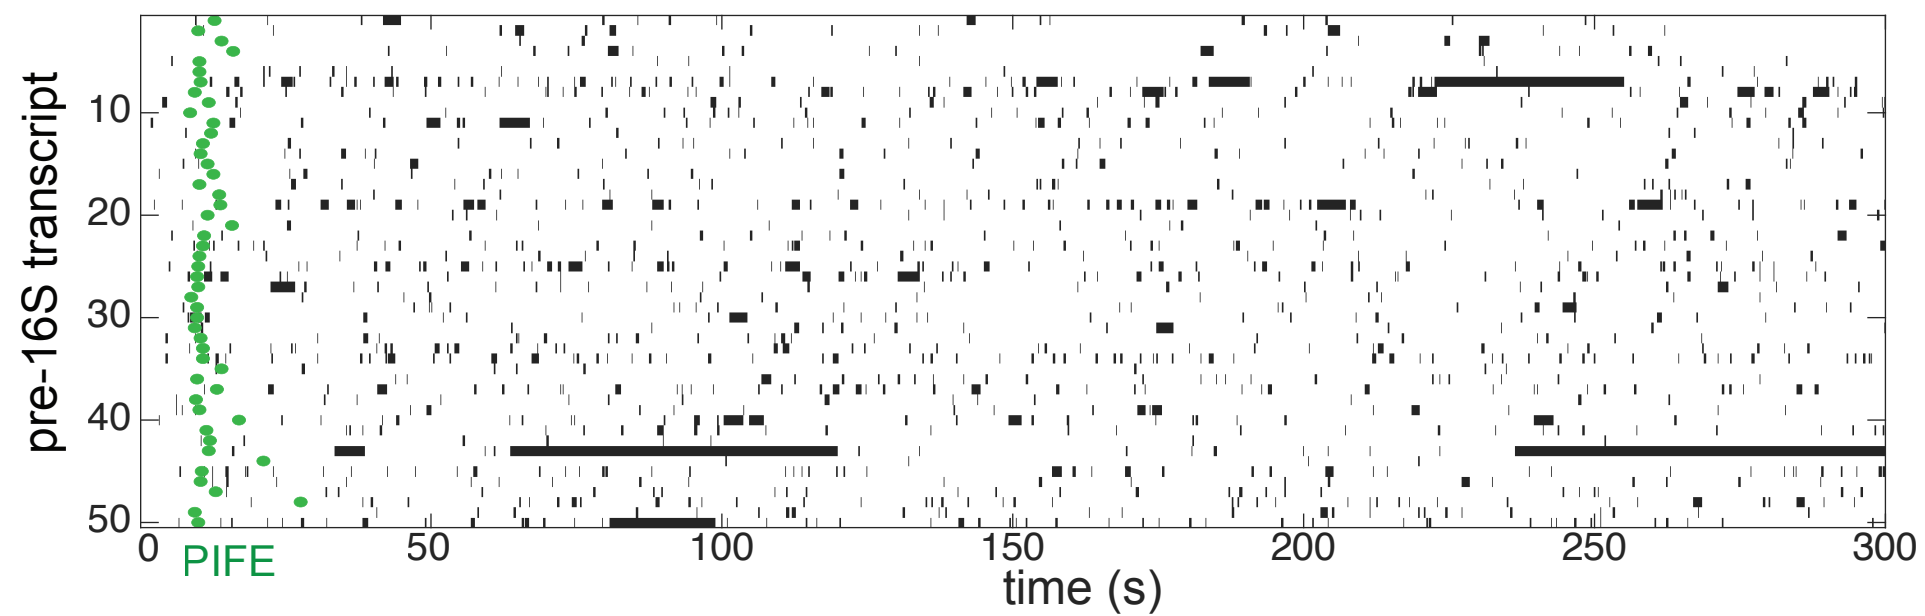

b

**100 nM S5**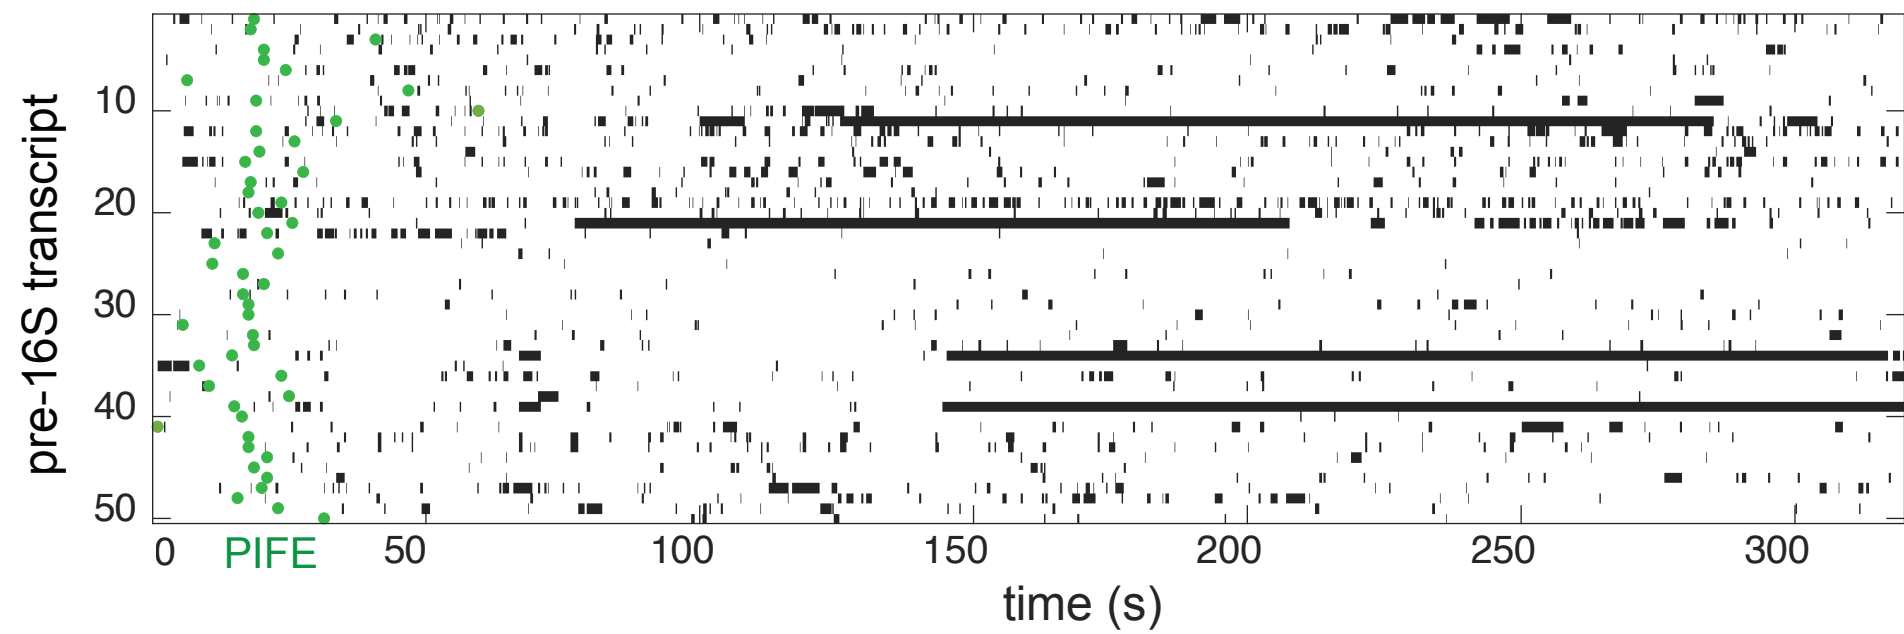

c

**50 nM S16**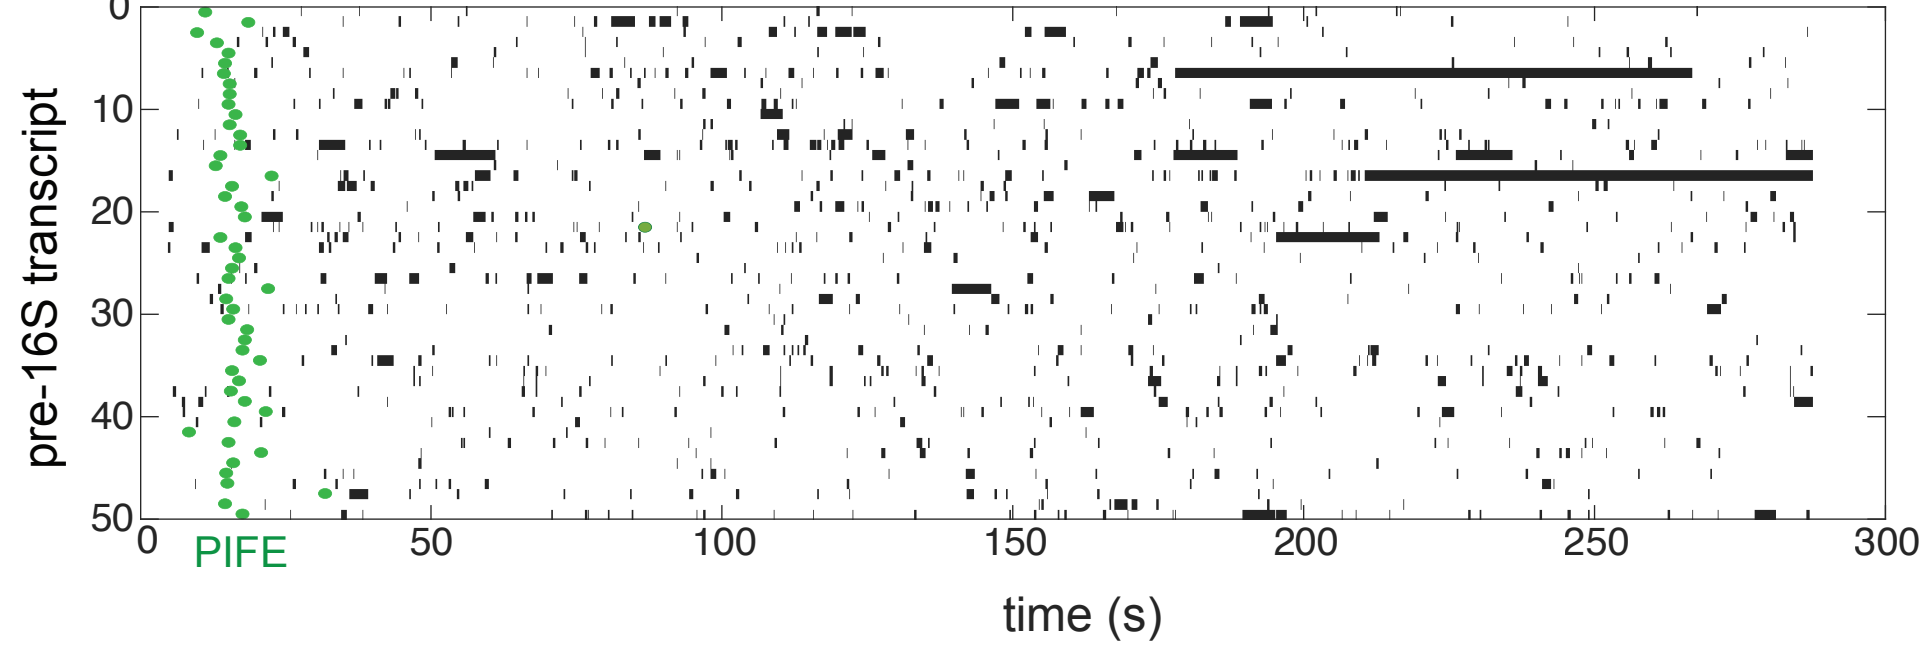

Supplement: s1 [file s1]

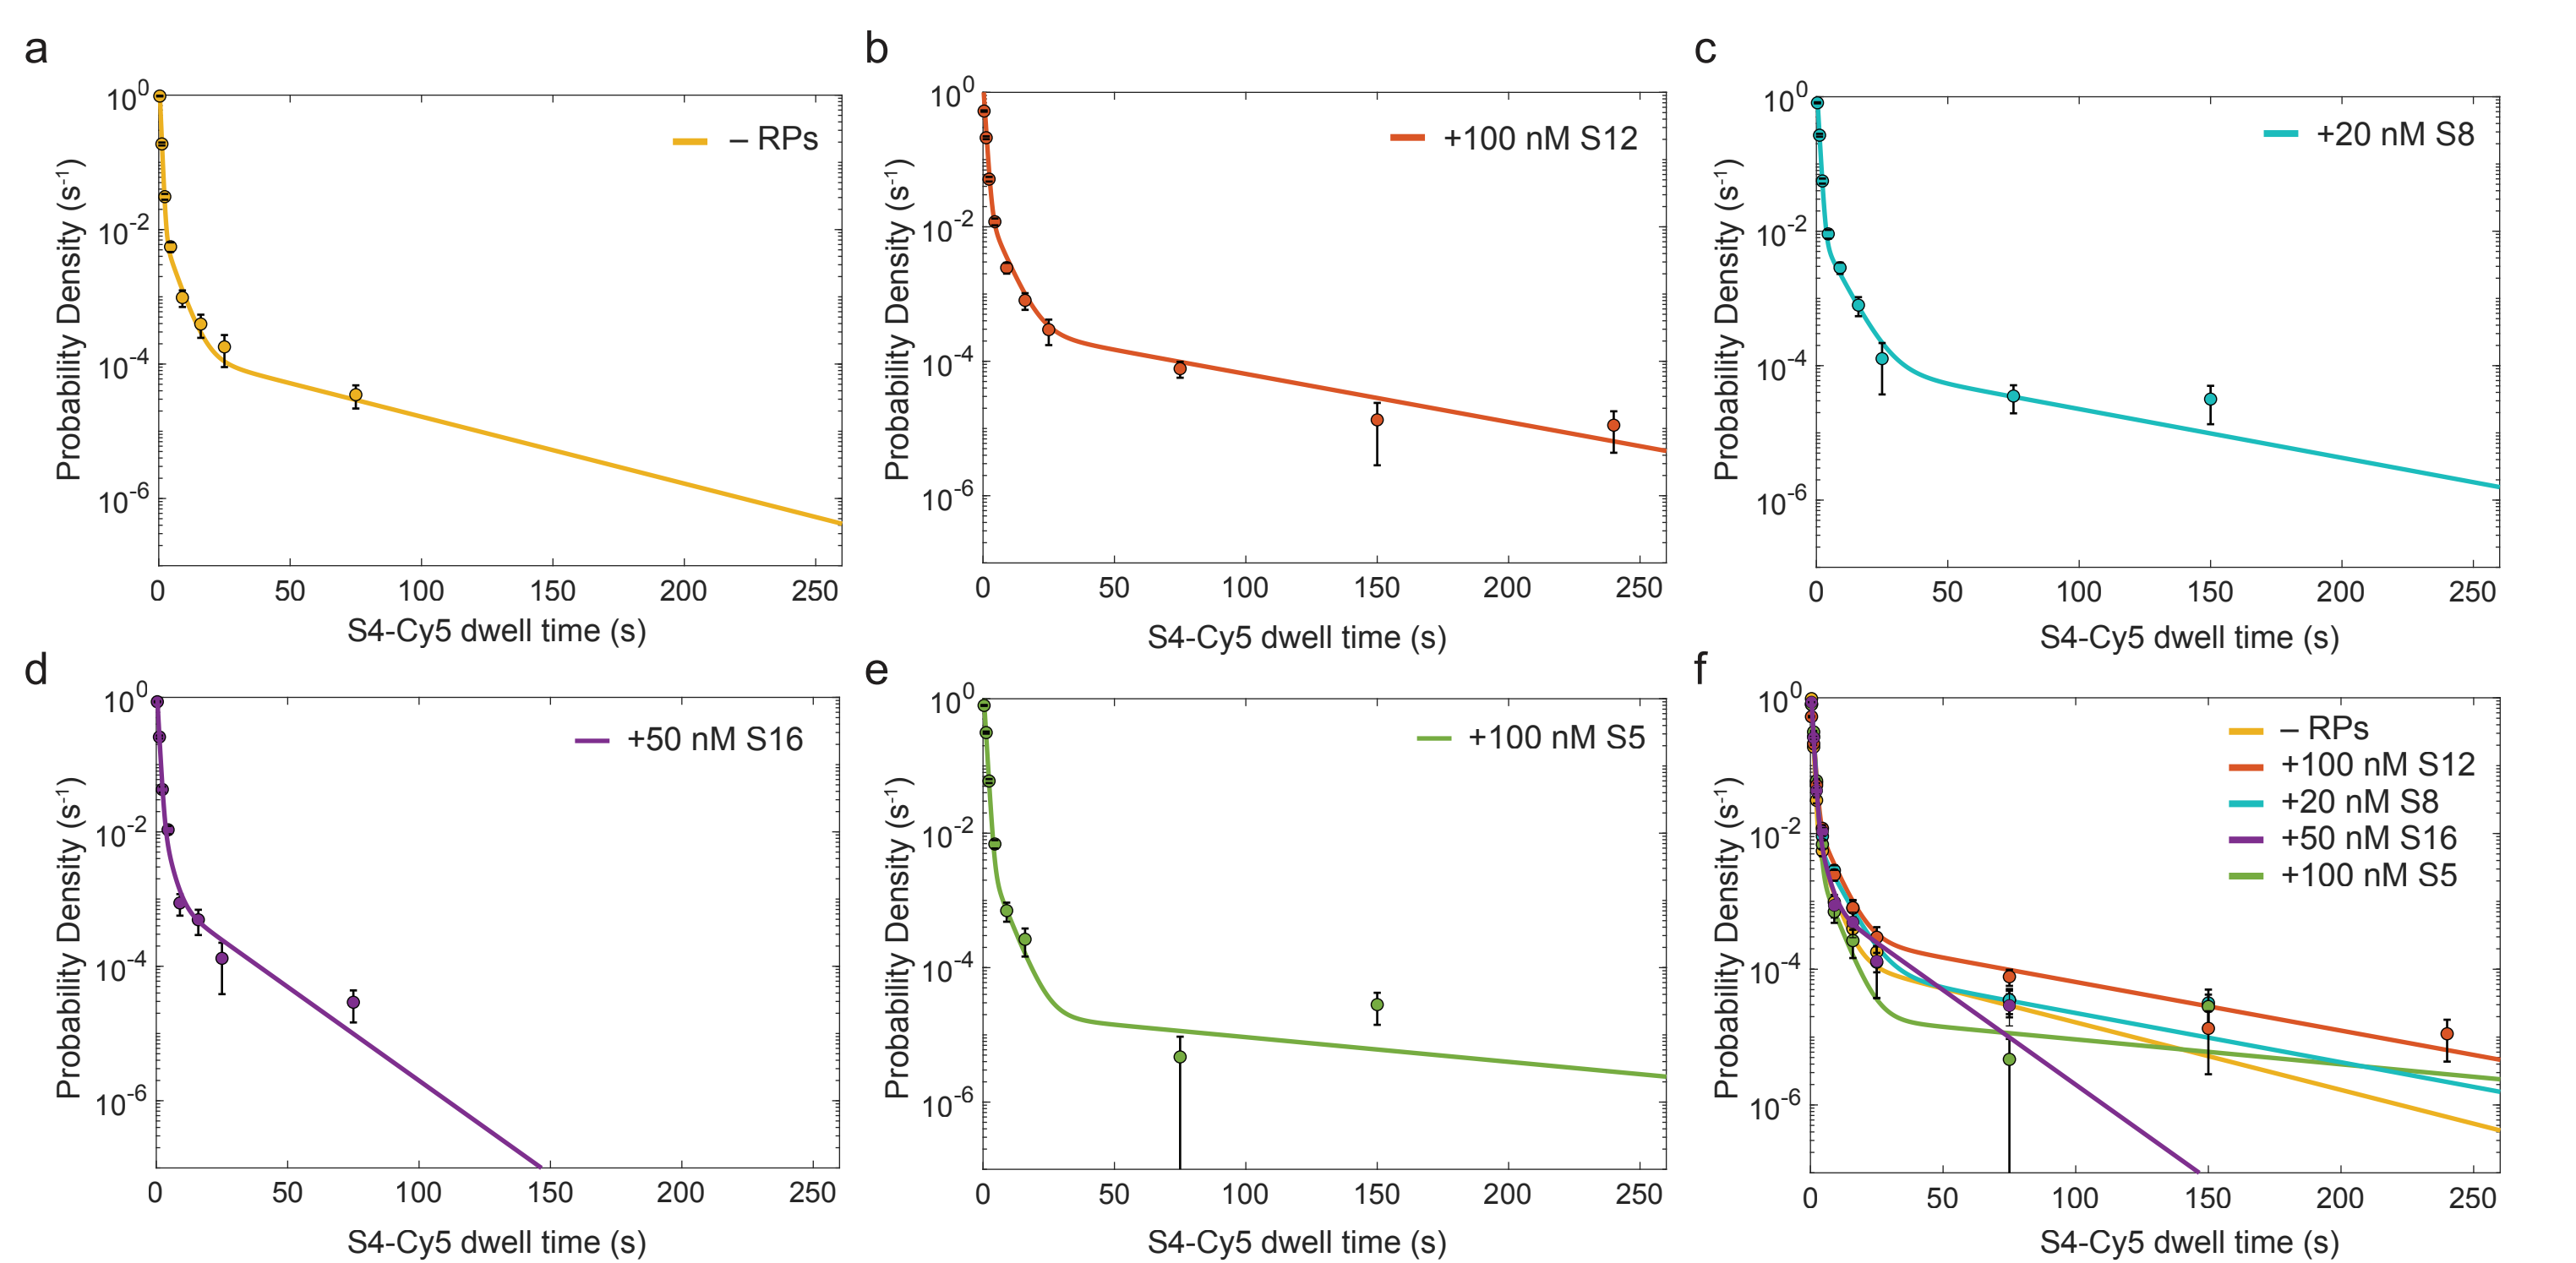

Supplement: s1 [file s1]

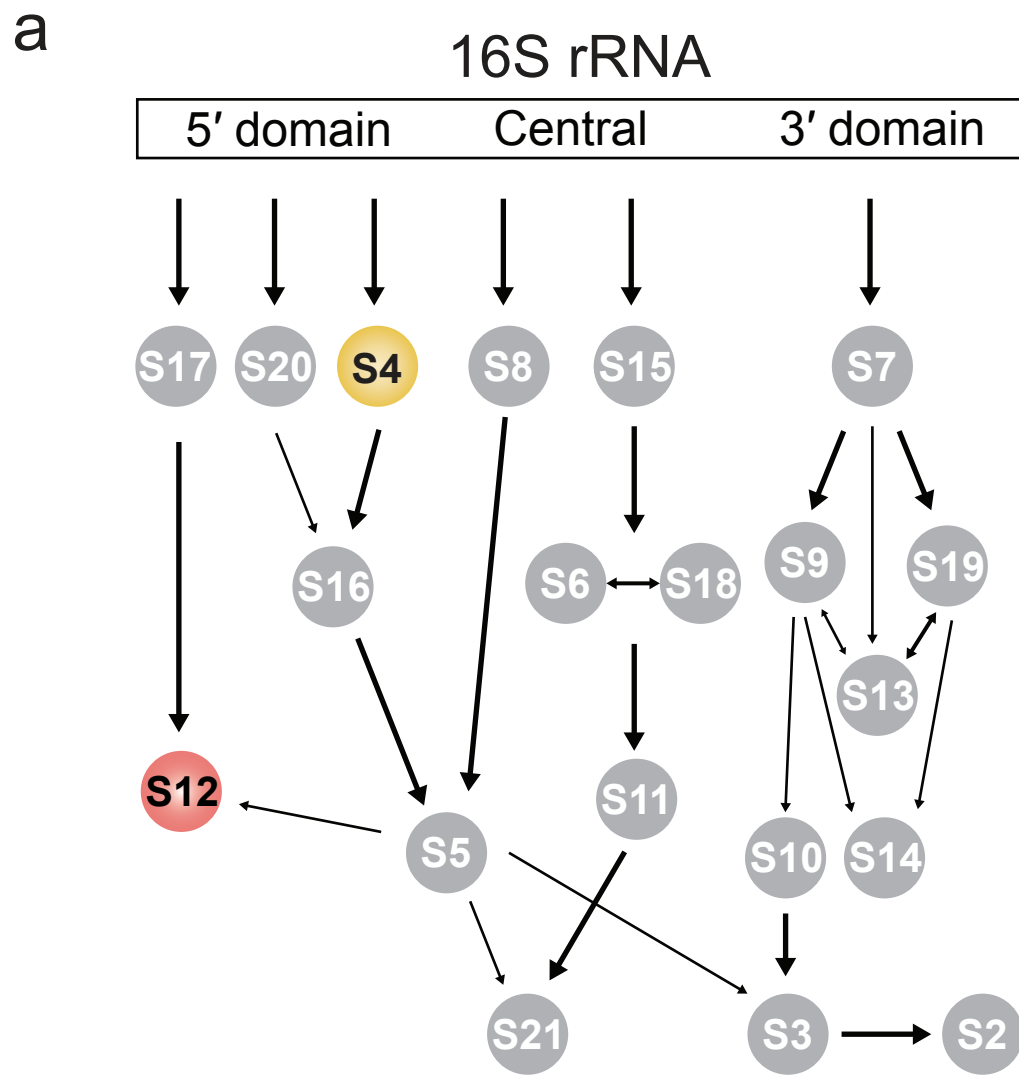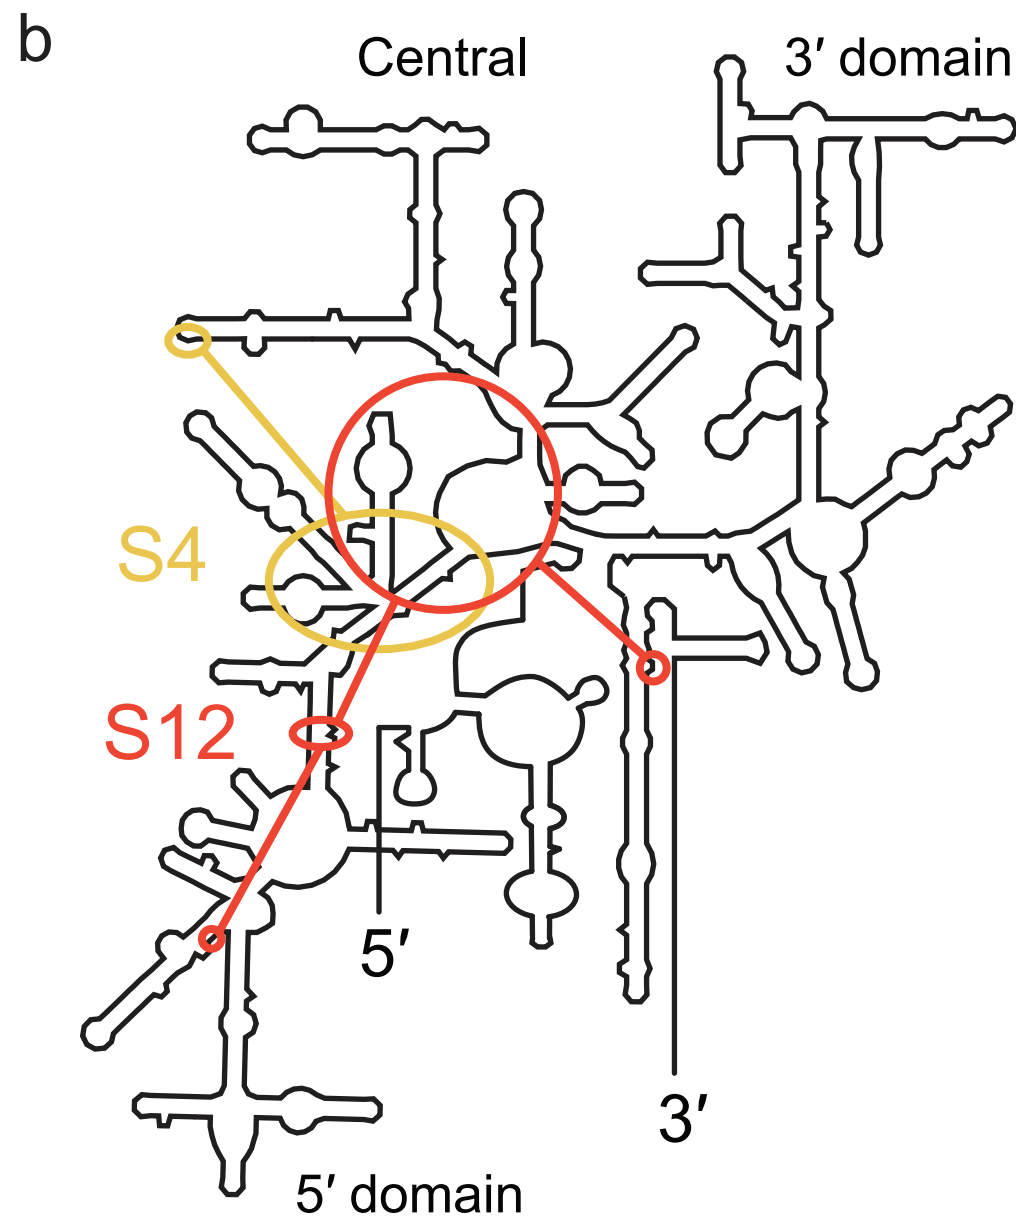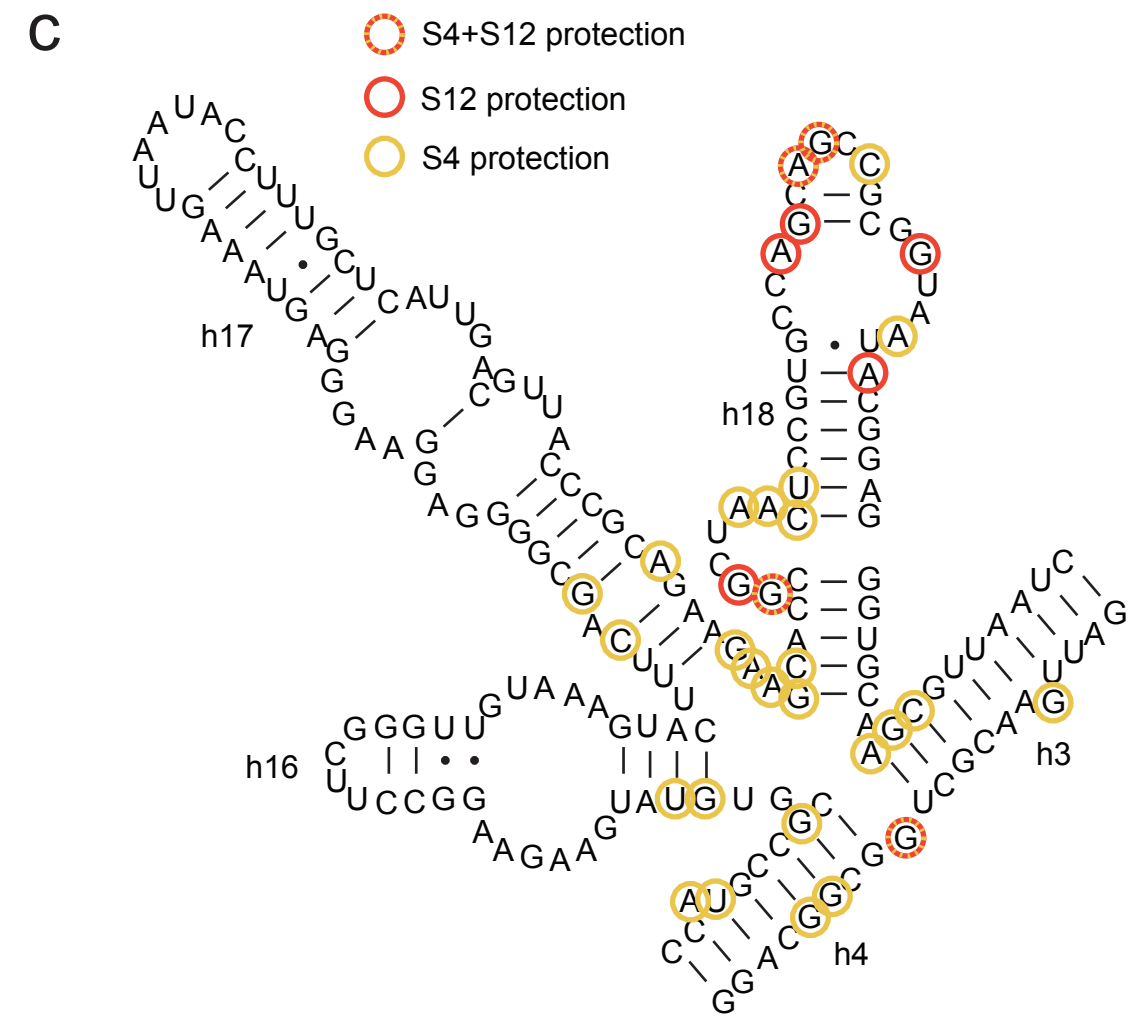

Supplement: s1 [file s1]
